# Supplementary material
Source: ML conference proceedings conference paper supplement (https://proceedings.neurips.cc/paper_files/paper/2021/hash/cb8da6767461f2812ae4290eac7cbc42-Abstract.html)
Supplement: Supplementary file 1 [file cb8da6767461f2812ae4290eac7cbc42-Supplemental.zip]

Archive with 1 entries (1 files):
- 2021_NeurIPS_On_Training_Implicit_Models_supp.pdf
